# Supplementary material for: Effects of personality and rearing-history on the welfare of captive Asiatic lions (Panthera leo persica)
Source: PeerJ. 2020 Feb 6;8:e8425. doi: 10.7717/peerj.8425 (PMC7007979; doi:10.7717/peerj.8425)
Supplement: Supplemental Information 4 [file peerj-08-8425-s004.xlsx]

## Sheet: peerj submit
	bold->1, shy->0	wild->1, captive-raised->0					female->0, male ->1
Name	Personality	lifehistory	Enclosure usage	Behaviour diversity	Aberrant repetitive behaviour perecentage	Latency in seconds	Sex	Age in days
A1	0	1	0.612	0.8556	12	102	1	3414
Aftab	1	1	0.5	1.2	6.68	12.53	1	3500
Amal	1	0	0.2831	1.2139	6.32	3.68	1	2214.74
Ambica	1	0	0.5896	1.3269	4.81	15.66	0	3984.56
Amiya	1	0	0.5325	1.4545	3.39	9.65	0	2037.56
Ani	0	1	0.7139	1.1359	9	117.5	0	1946
Bahadur	1	0	0.3262	1.4963	3.23	4.28	1	1053.33
bigtwin	0	1	0.5451	0.9309	11.31	126.5	0	800.33
Dharicub	1	1	0.5733	0.6068	13.42	7	1	619.5
Dheer	1	1	0.5733	1.316	4.81	11	1	5389.08
Gina	0	0	0.6721	0.7618	20.34	71.76	0	1316.9
Girm	1	1	0.4362	1.1086	8.9	15.61	1	3337.92
Hemal	0	1	0.9	0.3012	22	113	1	2029
Hemali	0	1	0.6337	0.7084	16.23	87.5	0	2149
Jenifer	1	0	0.5723	1.1907	8	12.35	0	1491.33
Jesal	1	1	0.5823	1.2572	6.12	15.41	1	5722.18
Maheswar	1	0	0.3698	1.5729	1.7	11.36	0	3411.26
Mariyam	1	0	0.3977	1.5556	2.67	13.23	0	3423.35
maytri	1	0	0.3949	0.7436	12.23	15	0	3072.9
Nagraj	0	1	0.9	0.34	21	89.29	1	3227
Patvad	0	1	0.8	0.7	17.11	109.5	0	3729
patvadm	0	1	0.9	0.2	25	115	1	1537
Radha	1	0	0.3723	1.078	12	10	0	1291.3
Rani	1	0	0.417	1.0583	13.42	8.5	0	1291.3
Ranita	1	0	0.5617	1.1168	8.48	17	0	2119
Ranshi	0	1	0.889	0.44	20.52	110	0	5109
Rudi	0	1	0.78	0.65	18.12	118.56	0	4700
smt	0	1	0.4895	1.1845	10	88	0	800.33
Subhi	0	0	0.4671	1.3304	8	74.35	0	2240.33
Sujan	0	1	0.6636	0.7068	15.24	115	0	2790.8
Taukir	1	0	0.499	1.3539	13.2	9.18	1	2448
Teeta	1	0	0.4437	1.6874	4.81	11.67	0	2166.93
Tejaswin	1	0	0.6855	1.2658	1.3	10.22	0	4320.93
Trakuda	1	1	0.7799	1.2687	6	7.5	1	3956.93
Veer	1	1	0.5684	0.9586	5.89	12.83	1	5387.3
